# Supplementary material
Source: publisher figshare collection journal article supplement (https://sage.figshare.com/ndownloader/files/23949941)
Supplement: Supplementary file 1 [file 23949941]

### **Supplemental Figure 1. Tweetbinder Graphic**

Tweetbinder produces a graphic with detailed metrics for each hashtag.

#APCPRODS2018: <https://www.tweetbinder.com/report/advanced/en/1cdef526>

#APC19BOSTON: <https://www.tweetbinder.com/report/advanced/en/4eb1bf84>

### **Supplemental Figure 2. Social media platforms by popularity**

Although Twitter is the most popular social media platform at academic conferences, it is not among the top five social media platforms among the general USA population. (Pew Research Center)
